# Supplementary material for: Ephemeral Wetland Vegetation in Mediterranean Heathland and Maquis Communities
Source: Springer Nature journal article supplement (doi:10.1007/s13157-011-0165-8), 2011-04-05

# Ephemeral wetland vegetation in Mediterranean heathland and maquis communities

## Wetlands

Michael Rudner

Dept. Geobotany, Faculty of Biology, University of Freiburg, Schänzlestr. 1, D-79104 Freiburg, Germany

E-Mail: michael.rudner@biologie.uni-freiburg.de

### Online Appendix 2 Vegetation structure in the communities (see Table 1)

(Boxplots of the cover of the layers T: tree layer, S1: upper shrub layer, S2: lower shrub layer, DS: dwarf shrubs, HG: herbs and grasses, EV: ephemeral wetland vegetation)

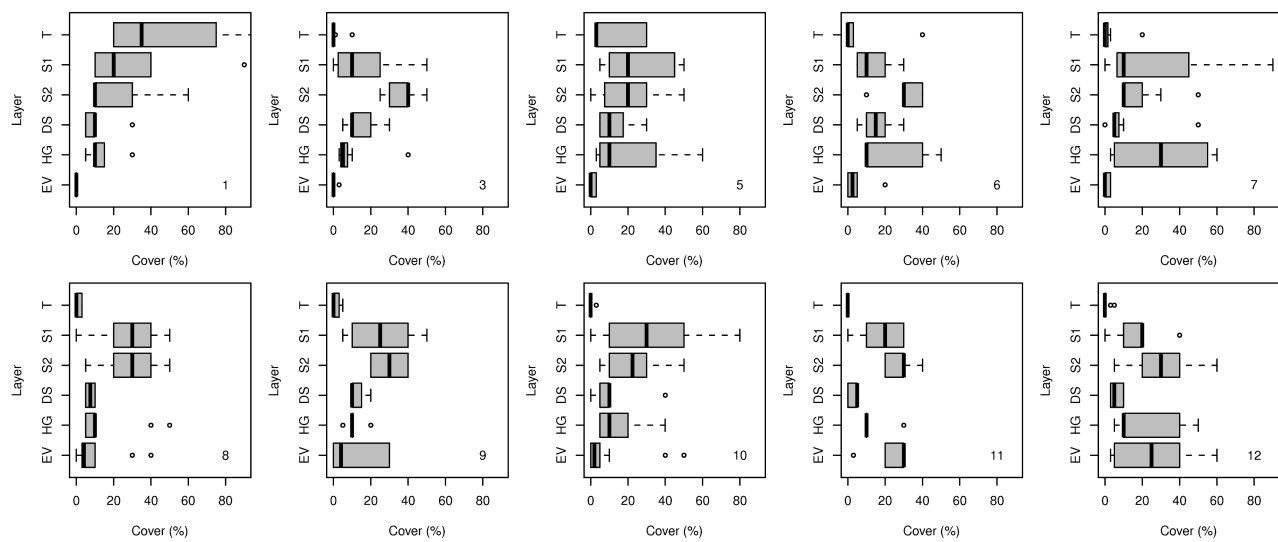

**Online Appendix 3** Depth of the impervious subsoil horizon in the communities

(No IL: impervious subsoil horizon absent, for the description of the communities see Online Appendix 1)

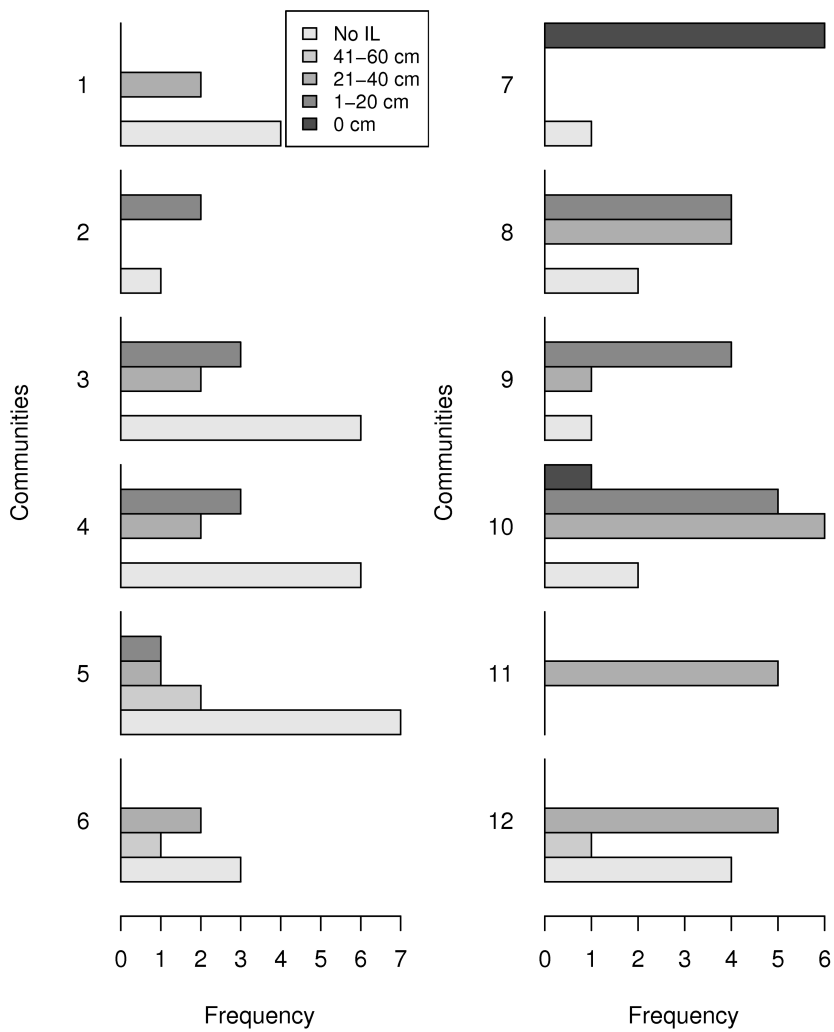

Supplement: MOESM2 [file 13157_2011_165_MOESM2_ESM.pdf]
